# Supplementary material
Source: publisher site journal article supplement (https://www.dovepress.com/article/484884)
Supplement: Supplementary file 1 [file get_supplementary_file.php]

**Supplementary document**

Supplementary Table 1. Responses to Near Activity Visual Questionnaire (NAVQ) ………………...………….2

Supplementary Table 2. Responses to CATQUEST-9SF (CQ-9SF) …………………………………………..…4

Supplementary Table 3. Responses to dysphotopsia questionnaire …………..…………………………………..5

Supplementary Table 4. Responses to Spectacle dependence questionnaire ………………...…………………...6

**Supplementary Table 1. Responses to Near Activity Visual Questionnaire (NAVQ), presented as number of responses for each IOL**

| **Near Activity Visual Questionnaire (NAVQ)** | | | | | |
| --- | --- | --- | --- | --- | --- |
| How much difficulty do you have: |  | Synergy | MF30 | AT LISA | PCB00 |
| Q1 Reading small print | no difficulty | 3 | 8 | 7 | 3 |
| a little difficulty | 5 | 0 | 2 | 2 |
| moderate difficulty | 1 | 0 | 0 | 1 |
| extreme difficulty | 0 | 1 | 0 | 3 |
| NA or stopped activity | 0 | 0 | 0 | 0 |
|  |  |  |  |  |  |
| Q2 Reading labels/instructions/ ingredients/prices | no difficulty | 4 | 5 | 8 | 1 |
| a little difficulty | 4 | 1 | 1 | 3 |
| moderate difficulty | 1 | 1 | 0 | 0 |
| extreme difficulty | 0 | 1 | 0 | 5 |
| NA or stopped activity | 0 | 1 | 0 | 0 |
|  |  |  |  |  |  |
| Q3 Reading your post/mail? | no difficulty | 9 | 8 | 8 | 6 |
| a little difficulty | 0 | 0 | 1 | 2 |
| moderate difficulty | 0 | 1 | 0 | 0 |
| extreme difficulty | 0 | 0 | 0 | 1 |
| NA or stopped activity | 0 | 0 | 0 | 0 |
|  |  |  |  |  |  |
| Q4 writing and reading your own writing? | no difficulty | 8 | 8 | 8 | 7 |
| a little difficulty | 1 | 0 | 1 | 1 |
| moderate difficulty | 0 | 1 | 0 | 1 |
| extreme difficulty | 0 | 0 | 0 | 0 |
| NA or stopped activity | 0 | 0 | 0 | 0 |
|  |  |  |  |  |  |
| Q5 Seeing the display and keyboard on a computer/calculator? | no difficulty | 4 | 6 | 8 | 5 |
| a little difficulty | 2 | 1 | 1 | 2 |
| moderate difficulty | 0 | 0 | 0 | 1 |
| extreme difficulty | 0 | 1 | 0 | 1 |
| NA or stopped activity | 3 | 1 | 0 | 0 |
|  |  |  |  |  |  |
| Q6 Seeing the display and keyboard on a mobile or fixed telephone | no difficulty | 8 | 8 | 8 | 4 |
| a little difficulty | 1 | 0 | 1 | 3 |
| moderate difficulty | 0 | 1 | 0 | 1 |
| extreme difficulty | 0 | 0 | 0 | 1 |
| NA or stopped activity | 0 | 0 | 0 | 0 |
|  |  |  |  |  |  |
| Q7 Seeing objects close to you and engaging in your hobbies? | no difficulty | 8 | 8 | 8 | 7 |
| a little difficulty | 1 | 0 | 1 | 2 |
| moderate difficulty | 0 | 1 | 0 | 0 |
| extreme difficulty | 0 | 0 | 0 | 0 |
| NA or stopped activity | 0 | 0 | 0 | 0 |
|  |  |  |  |  |  |
| Q8 Seeing objects close to you in poor or dim light? | no difficulty | 4 | 5 | 8 | 7 |
| a little difficulty | 4 | 3 | 1 | 2 |
| moderate difficulty | 1 | 0 | 0 | 0 |
| extreme difficulty | 0 | 0 | 0 | 0 |
| NA or stopped activity | 0 | 1 | 0 | 0 |
|  |  |  |  |  |  |
| Q9 Maintaining focus for prolonged work? | no difficulty | 6 | 8 | 8 | 4 |
| a little difficulty | 1 | 1 | 1 | 4 |
| moderate difficulty | 0 | 0 | 0 | 0 |
| extreme difficulty | 0 | 0 | 0 | 0 |
| NA or stopped activity | 2 | 0 | 0 | 1 |
|  |  |  |  |  |  |
| Q10 Conducting near work | no difficulty | 7 | 8 | 8 | 4 |
| a little difficulty | 1 | 0 | 1 | 3 |
| moderate difficulty | 0 | 0 | 0 | 1 |
| extreme difficulty | 0 | 1 | 0 | 0 |
| NA or stopped activity | 1 | 0 | 0 | 1 |
|  |  |  |  |  |  |
| Q11 How satisfied are you with your near vision? | Completely satisfied | 1 | 7 | 7 | 3 |
| Very satisfied | 8 | 2 | 2 | 2 |
| Moderately satisfied | 0 | 0 | 0 | 3 |
| Mildly satisfied | 0 | 0 | 0 | 0 |
| Unsatisfied | 0 | 0 | 0 | 1 |

**Supplementary Table 2. Responses to CATQUEST-9SF (CQ-9SF), presented as number of responses for each IOL**

| **CATQUEST-9SF** | | | | | |
| --- | --- | --- | --- | --- | --- |
|  |  | Synergy | MF30 | AT LISA | PCB00 |
|  |  |  |  |  |  |
| Do you find that your sight at present in some way causes you difficulty in your everyday life? | Great difficulty | 0 | 1 | 0 | 0 |
| Moderate difficulty | 1 | 0 | 0 | 1 |
| Mild difficulty | 3 | 3 | 0 | 2 |
| None | 5 | 4 | 9 | 6 |
| can't decide | 0 | 1 | 0 | 0 |
|  |  |  |  |  |  |
| Are you satisfied or dissatisfied with your sight at present? | Very satisfied | 7 | 3 | 8 | 5 |
| Moderately satisfied | 1 | 3 | 1 | 2 |
| Mildly satisfied | 1 | 2 | 0 | 1 |
| unsatisfied | 0 | 1 | 0 | 1 |
| can't decide | 0 | 0 | 0 | 0 |
|  |  |  |  |  |  |
| Reading text in newspapers | Great difficulty | 0 | 0 | 0 | 3 |
| Moderate difficulty | 0 | 0 | 0 | 2 |
| Mild difficulty | 2 | 2 | 1 | 2 |
| None | 5 | 7 | 8 | 2 |
| can't decide | 2 | 0 | 0 | 0 |
|  |  |  |  |  |  |
| Recognising the faces of people you meet | Great difficulty | 0 | 0 | 0 | 0 |
| Moderate difficulty | 0 | 0 | 0 | 0 |
| Mild difficulty | 0 | 0 | 0 | 0 |
| None | 9 | 9 | 9 | 9 |
| can't decide | 0 | 0 | 0 | 0 |
|  |  |  |  |  |  |
| Seeing the prices of goods when shopping | Great difficulty | 0 | 0 | 0 | 1 |
| Moderate difficulty | 1 | 0 | 0 | 0 |
| Mild difficulty | 2 | 1 | 1 | 1 |
| None | 6 | 8 | 8 | 7 |
| can't decide | 0 | 0 | 0 | 0 |
|  |  |  |  |  |  |
| Seeing to walk on uneven surfaces, e.g. cobblestones | Great difficulty | 0 | 0 | 0 | 0 |
| Moderate difficulty | 2 | 0 | 0 | 1 |
| Mild difficulty | 1 | 1 | 1 | 8 |
| None | 6 | 8 | 8 | 0 |
| can't decide | 0 | 0 | 0 | 0 |
|  |  |  |  |  |  |
| Seeing to do craft or sewing | Great difficulty | 0 | 0 | 0 | 2 |
| Moderate difficulty | 1 | 0 | 0 | 1 |
| Mild difficulty | 3 | 1 | 1 | 1 |
| None | 4 | 6 | 8 | 5 |
| can't decide | 1 | 2 | 0 | 0 |
|  |  |  |  |  |  |
| Reading subtitles on TV | Great difficulty | 0 | 0 | 0 | 0 |
| Moderate difficulty | 0 | 1 | 0 | 0 |
| Mild difficulty | 1 | 1 | 1 | 3 |
| None | 8 | 7 | 8 | 6 |
| can't decide | 0 | 0 | 0 | 0 |
|  |  |  |  |  |  |
| Seeing to engage in an activity/hobby that you are interested in | Great difficulty | 0 | 0 | 0 | 1 |
| Moderate difficulty | 0 | 1 | 0 | 1 |
| Mild difficulty | 2 | 0 | 0 | 2 |
| None | 7 | 8 | 9 | 5 |
| can't decide | 0 | 0 | 0 | 0 |

**Supplementary Table 3. Responses to dysphotopsia questionnaire, presented as number of responses for each IOL**

| **Dysphotopsia** | | | | | |
| --- | --- | --- | --- | --- | --- |
|  |  | Synergy | MF30 | AT LISA | PCB00 |
| Do you see halos around lights? | none | 3 | 4 | 5 | 8 |
| sometimes | 3 | 3 | 3 | 1 |
| always | 3 | 2 | 1 | 0 |
|  |  |  |  |  |  |
| Do you see glare in bright light? | none | 6 | 5 | 5 | 2 |
| sometimes | 2 | 2 | 2 | 6 |
| always | 1 | 2 | 2 | 1 |
|  |  |  |  |  |  |
| Do you see starburst around bright lights? | none | 3 | 4 | 6 | 6 |
| sometimes | 4 | 3 | 0 | 3 |
| always | 2 | 2 | 3 | 0 |

**Supplementary Table 4. Responses to Spectacle dependence questionnaire, presented as number of responses for each IOL**

| **Spectacle dependence** | | | | | |
| --- | --- | --- | --- | --- | --- |
| How often do you wear glasses for distance vision? |  | Synergy | MF30 | AT LISA | PCB00 |
| never | 7 | 8 | 8 | 7 |
| sometimes | 2 | 1 | 1 | 1 |
| most of the time | 0 | 0 | 0 | 1 |
| all the time | 0 | 0 | 0 | 0 |
| How often do you wear glasses for intermediate vision? |  |  |  |  |  |
| never | 7 | 7 | 8 | 6 |
| sometimes | 2 | 2 | 1 | 0 |
| most of the time | 0 | 0 | 0 | 1 |
| all the time | 0 | 0 | 0 | 2 |
| How often do you wear glasses for near vision? |  |  |  |  |  |
| never | 3 | 8 | 5 | 3 |
| sometimes | 6 | 1 | 4 | 0 |
| most of the time | 0 | 0 | 0 | 1 |
| all the time | 0 | 0 | 0 | 5 |
